# Supplementary material for: Trajectory of skill acquisition, loss, and regain in females with classic Rett syndrome
Source: Research Square preprint supplement (doi:10.21203/rs.3.rs-8245192/v1), 2025-12-15

**Figure S3: Cumulative incidence curves of time from skill gain to loss.** Censored data points are shown as cross lines. The red vertical line is the median time of gain to loss for that specific skill.

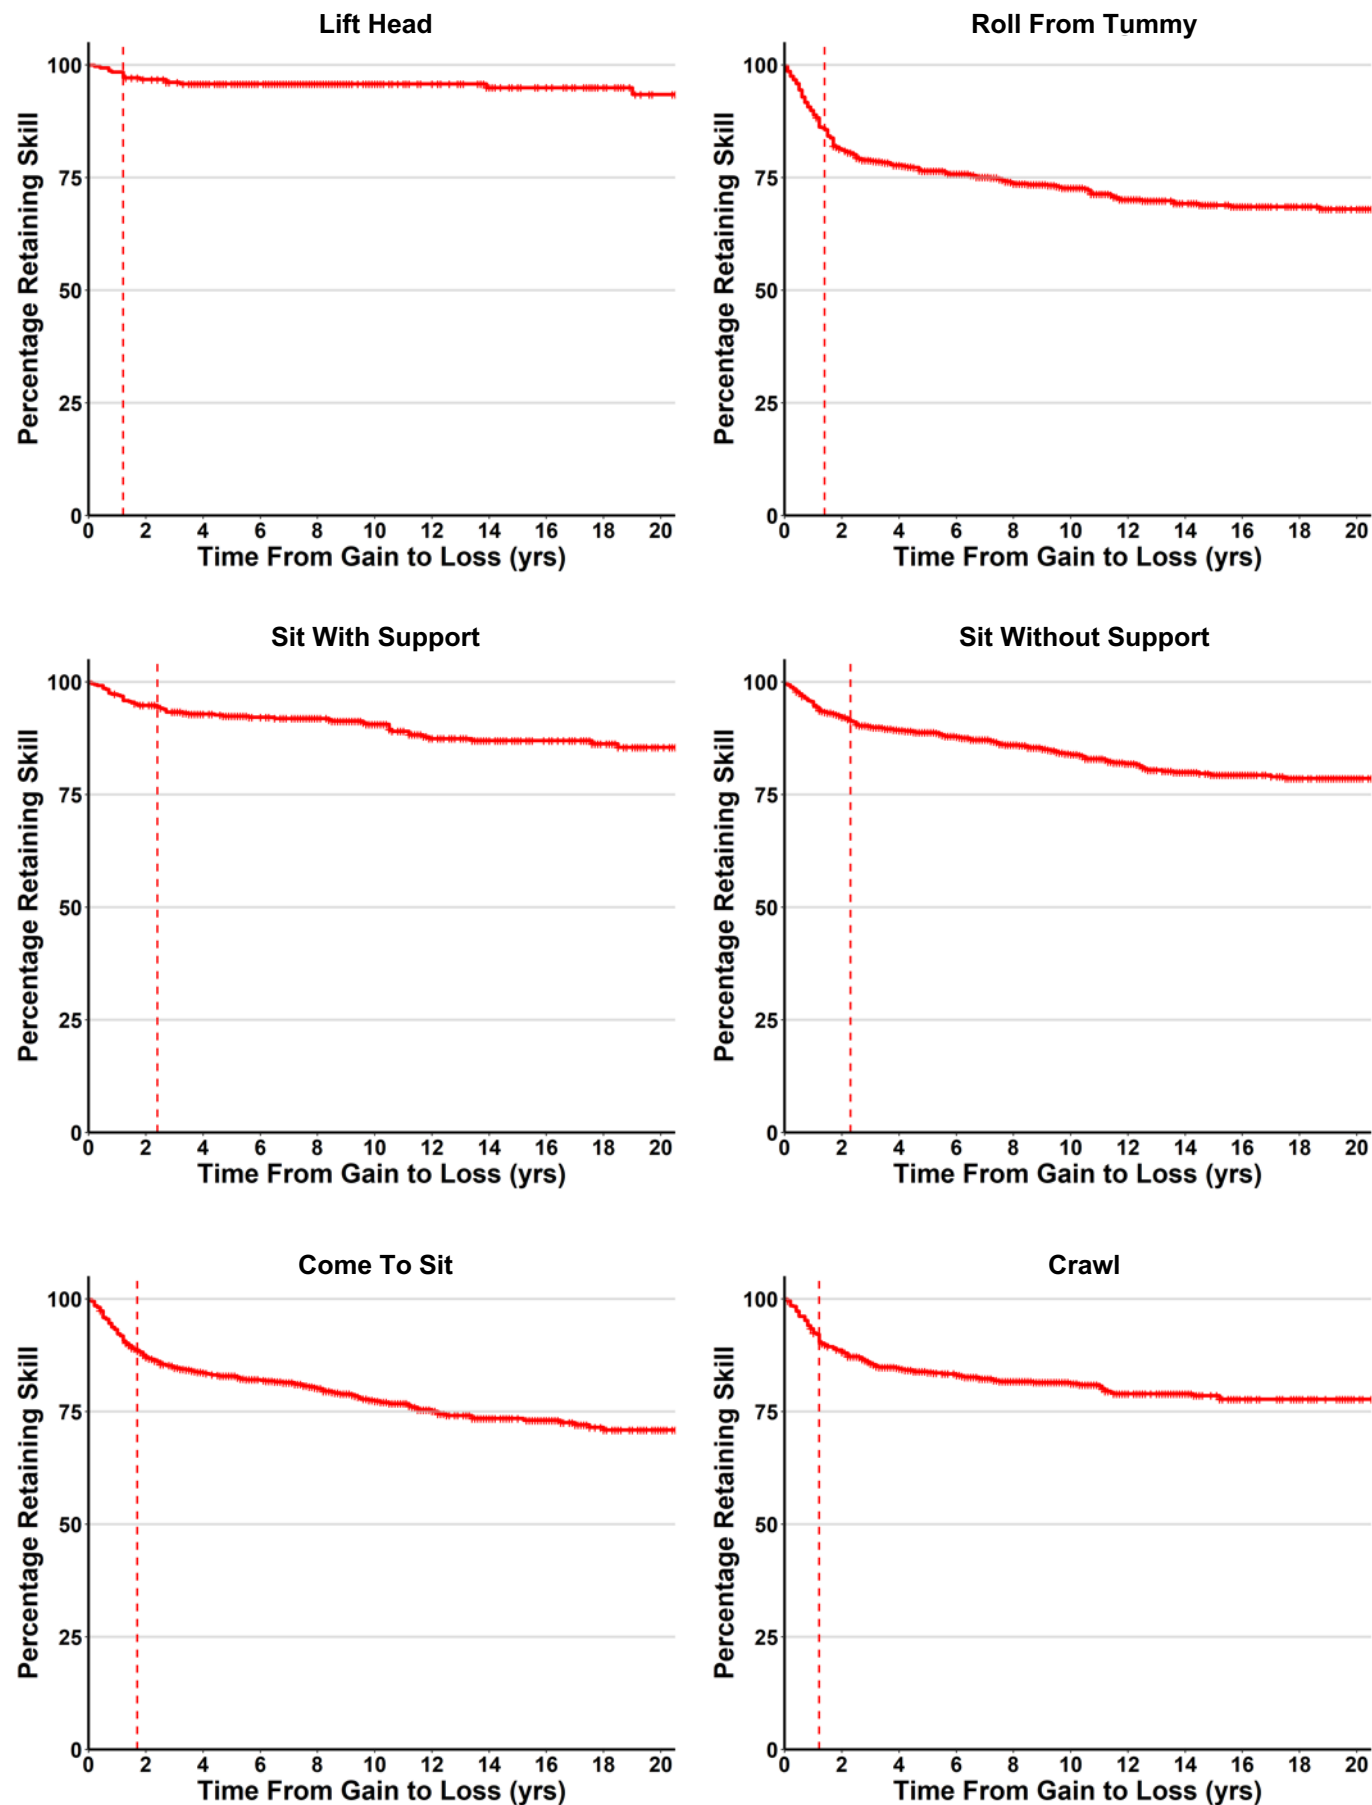

**Stand With Support**

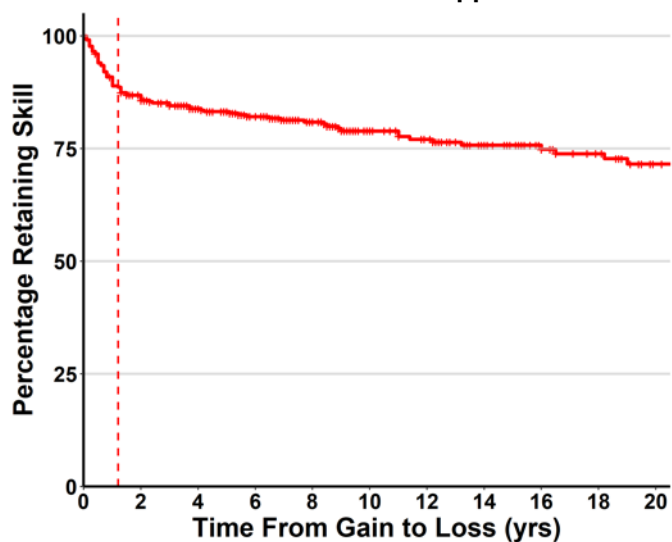

**Pull To Stand**

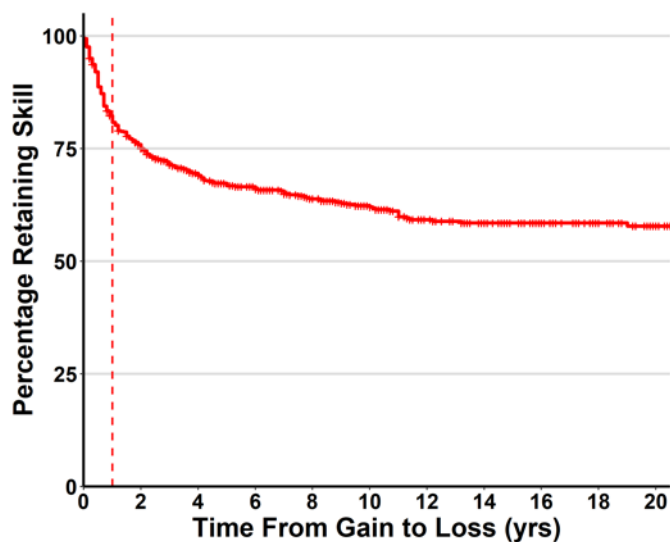

**Walk With Support**

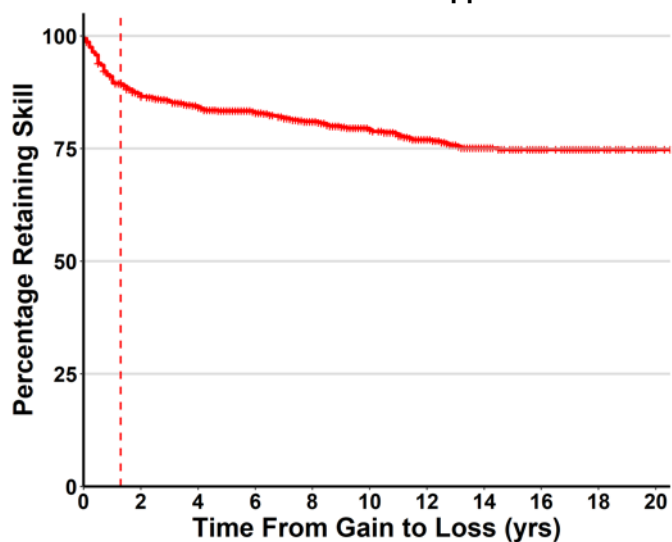

**Stand Independently**

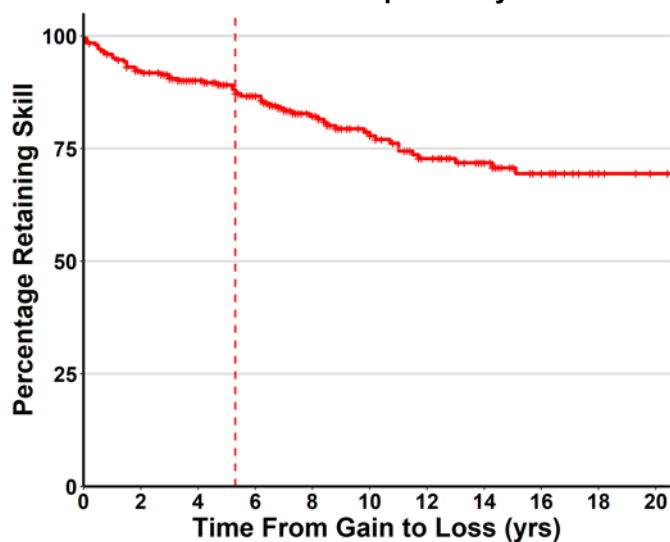

**Walk Independently**

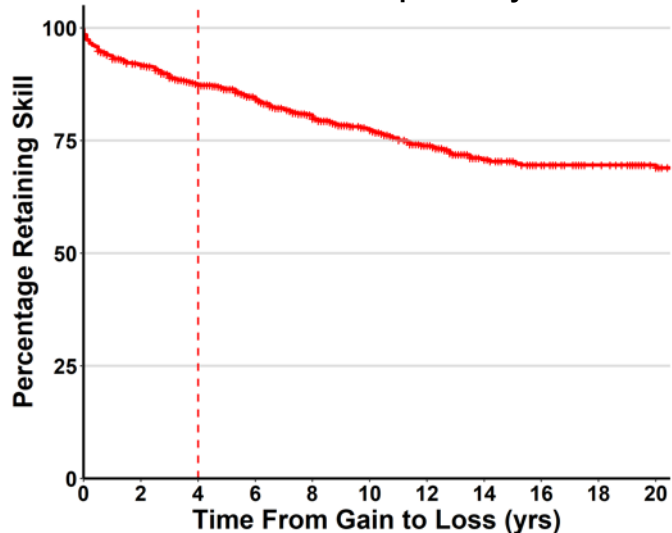

**Ran 10 Feet**

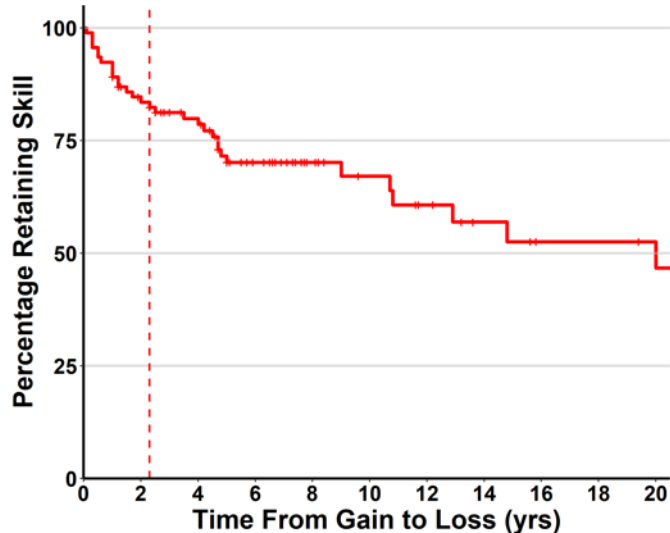

Up Stairs With Help

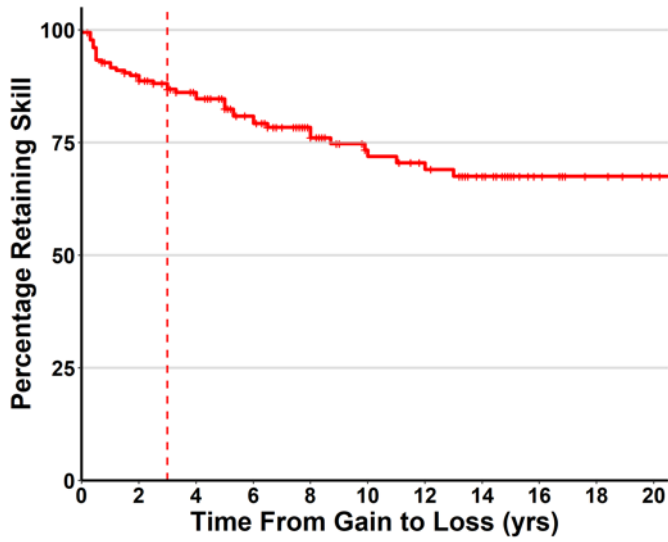

Up Stairs Without Help

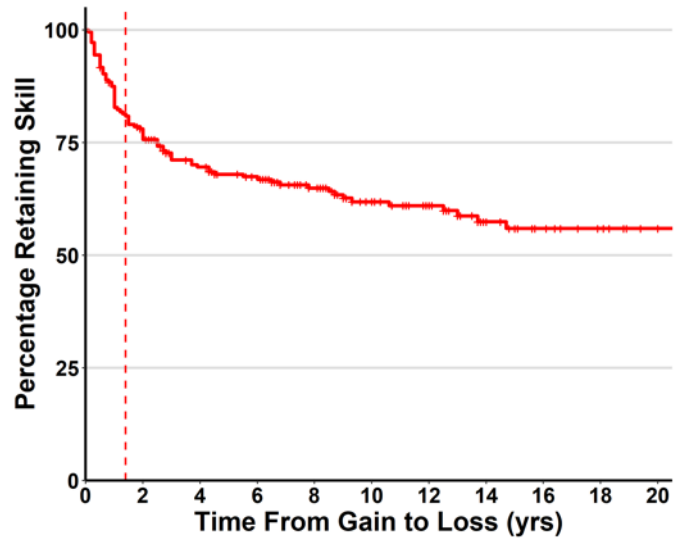

Down Stairs With Help

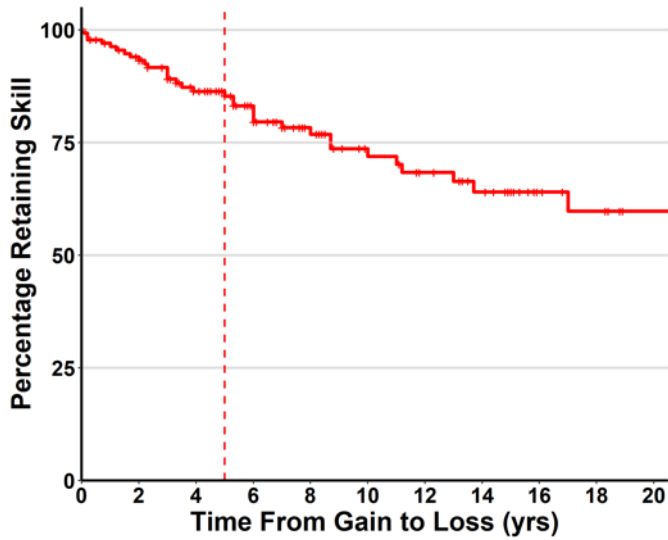

Down Stairs Without Help

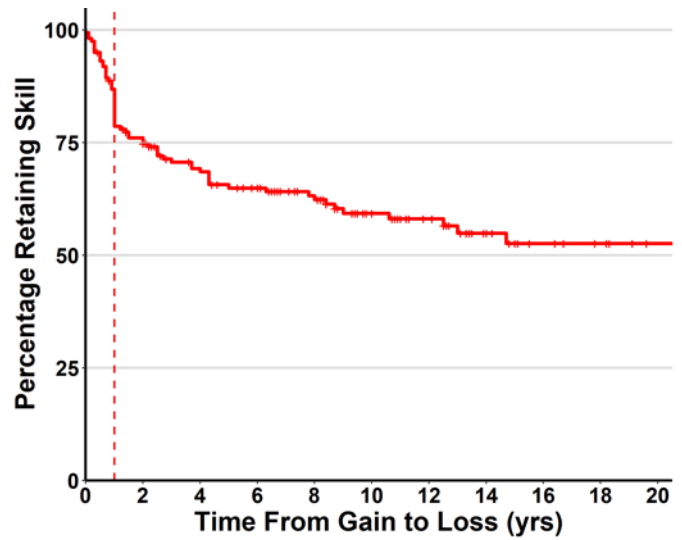

Hold Bottle

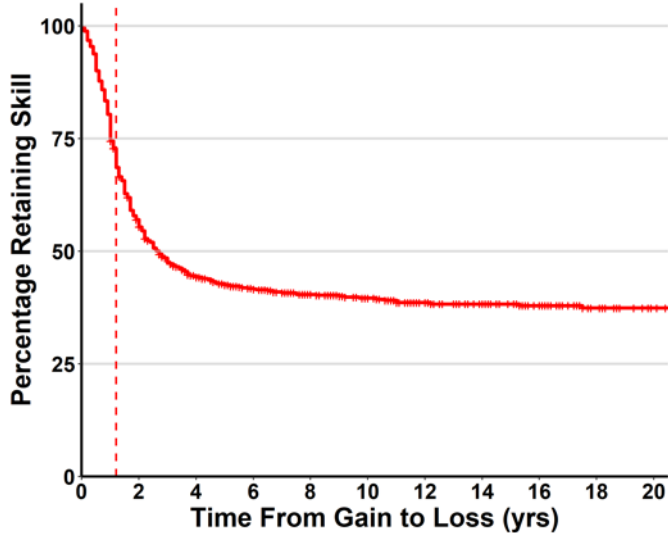

Reach For Toy

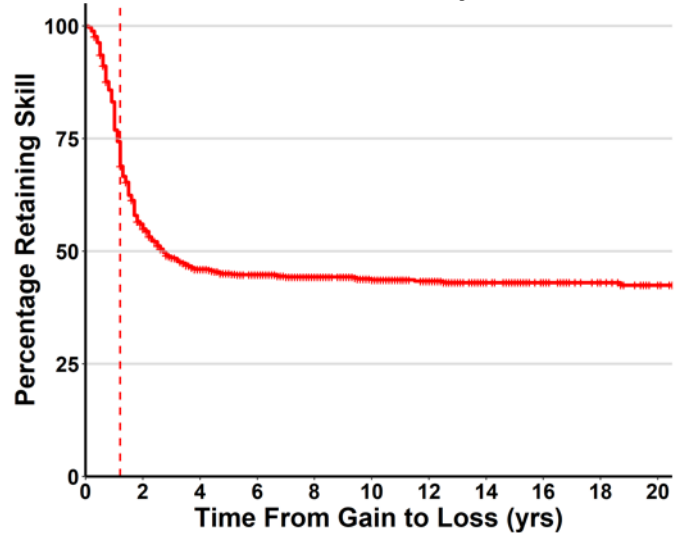

**Raking Grasp**

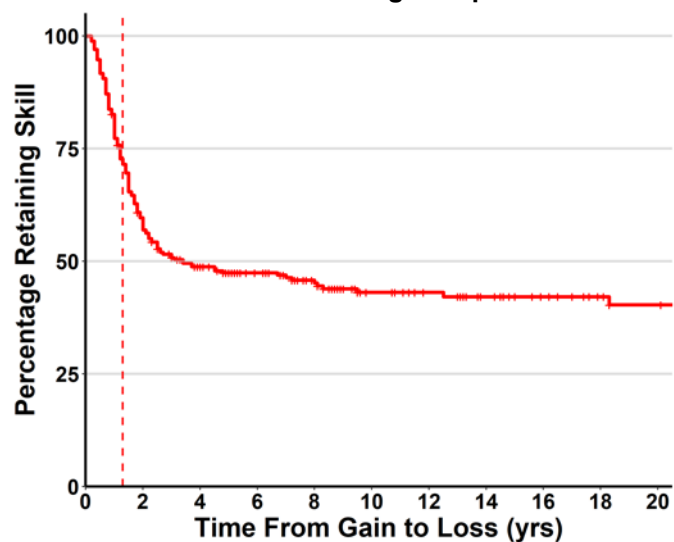

**Transfer Objects**

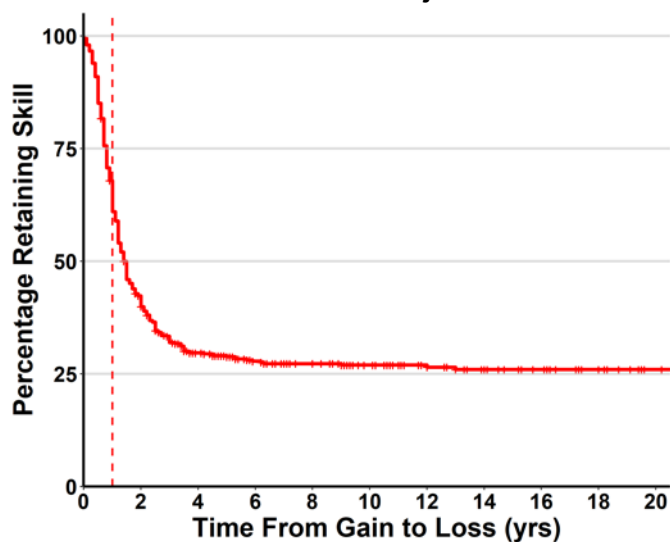

**Pincer Grasp**

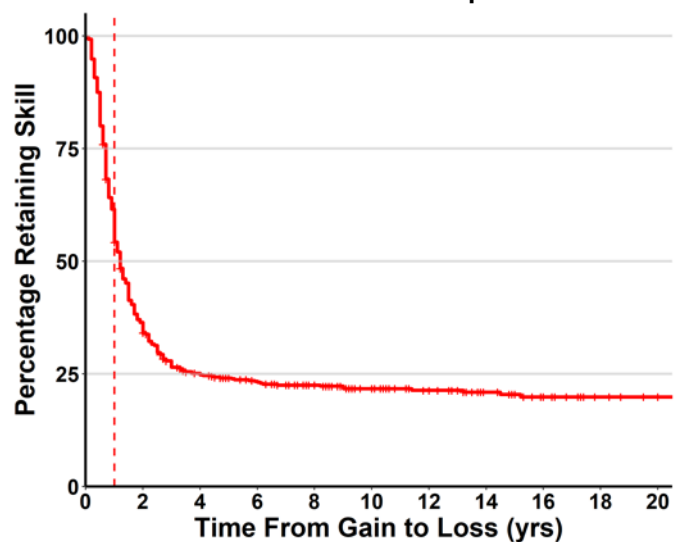

**Finger Feeding**

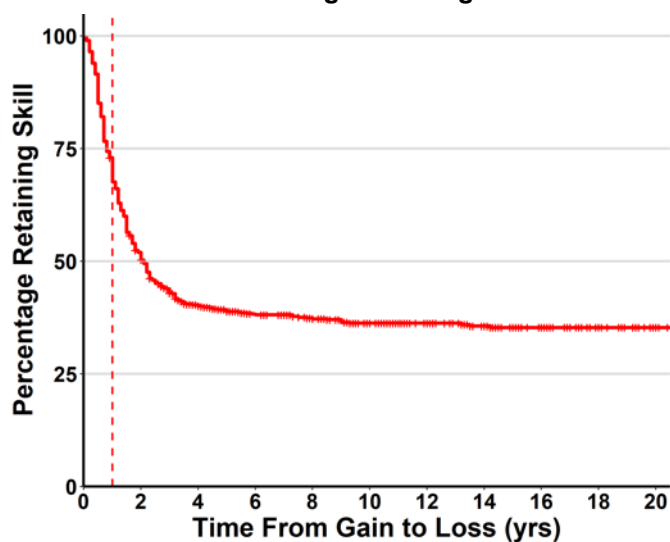

**Turn Pages in Book**

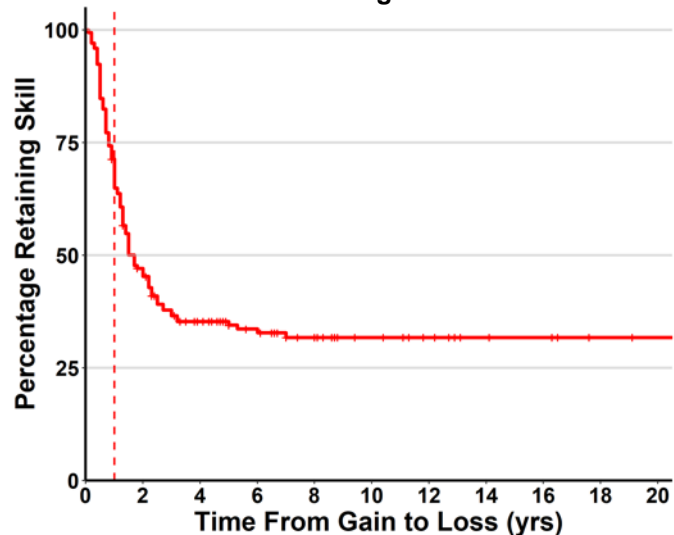

**Social Smile**

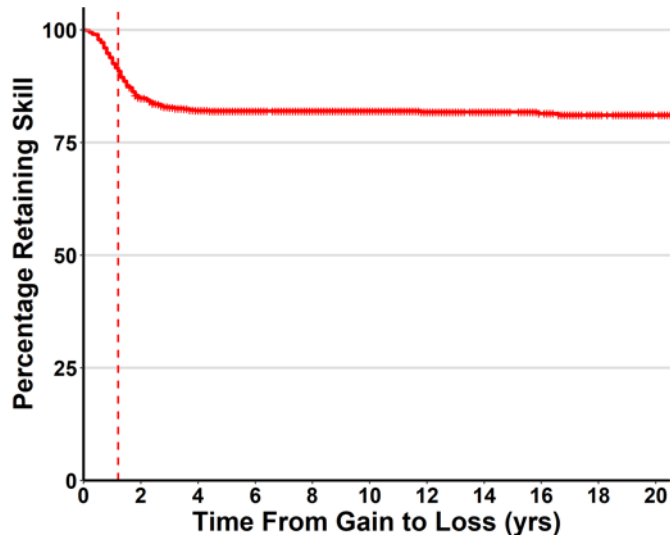

**Cooing**

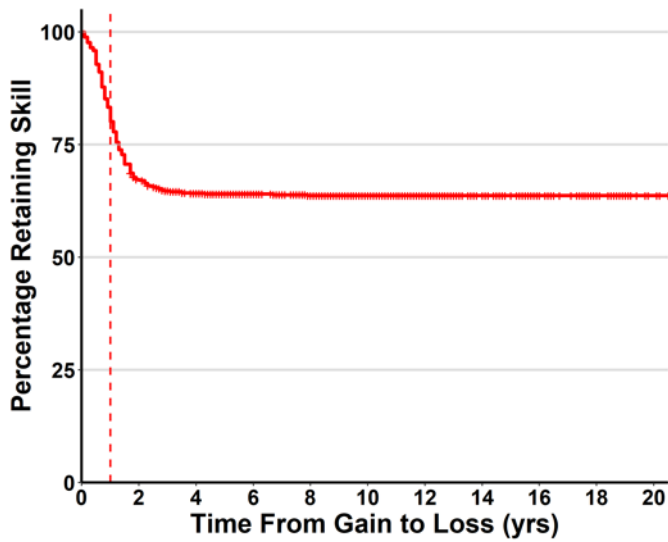

**Babbling**

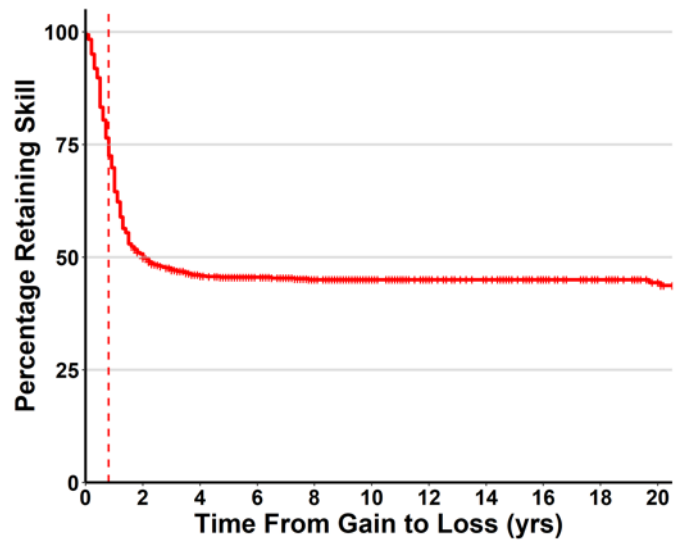

**Words With Meaning**

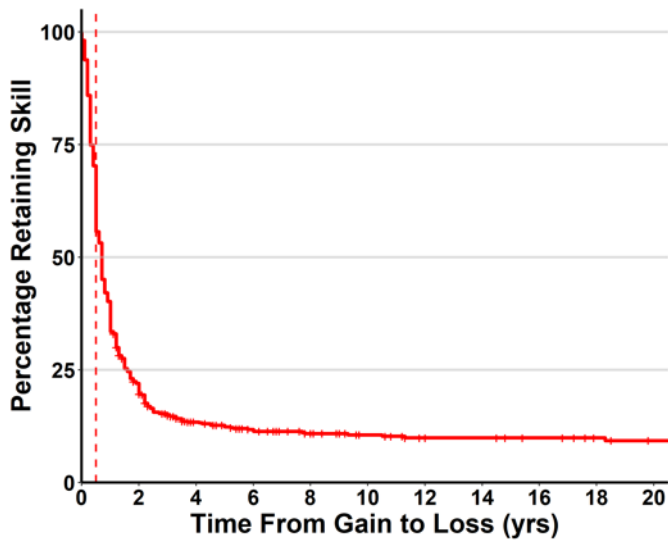

**Spoken Phrases**

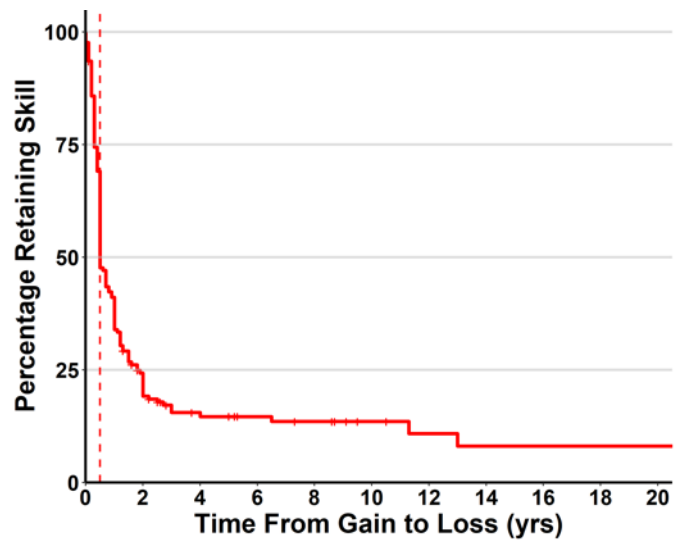

**Wave Bye**

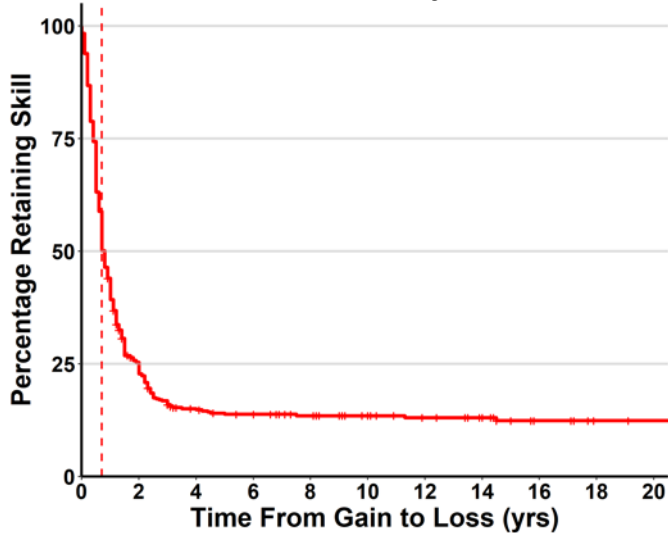

**Points for Wants**

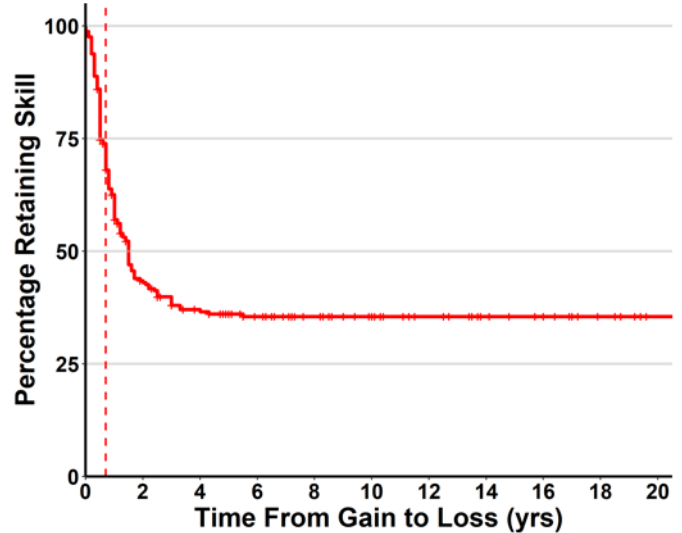

Shared Stories

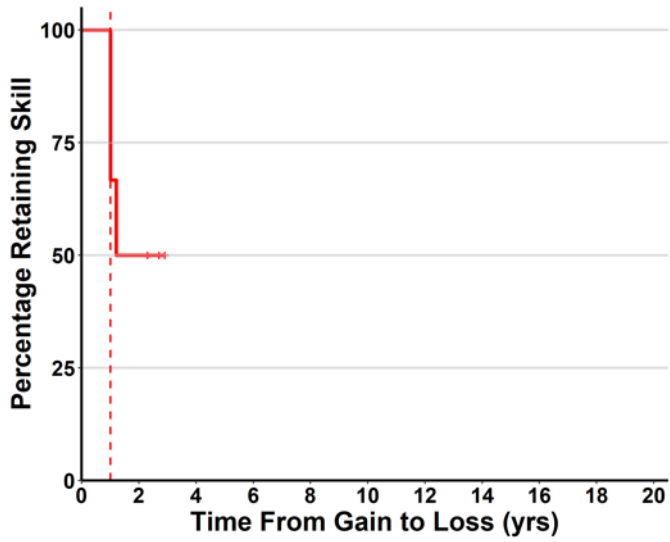

Quiet To Voice

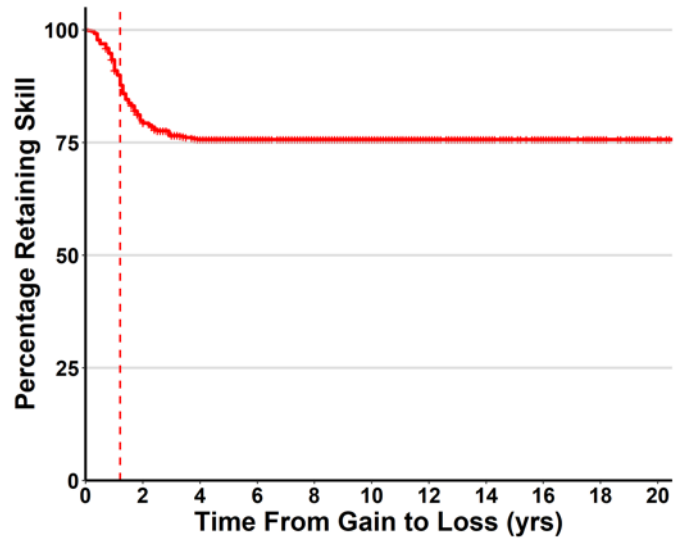

Respond To Sounds

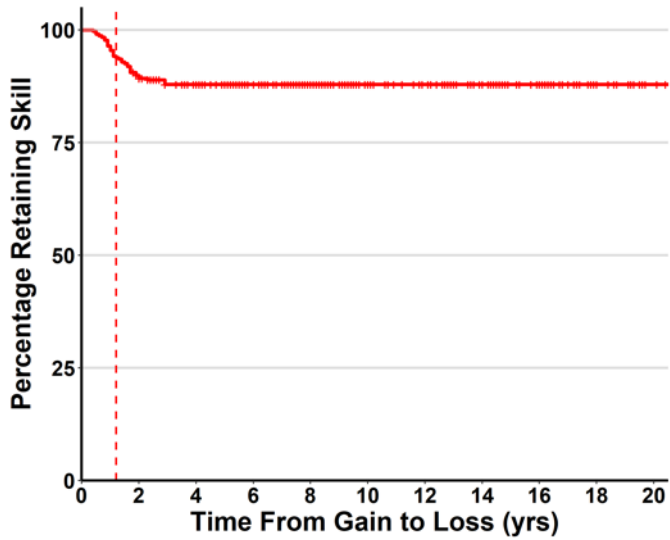

Play Peek-A-Boo

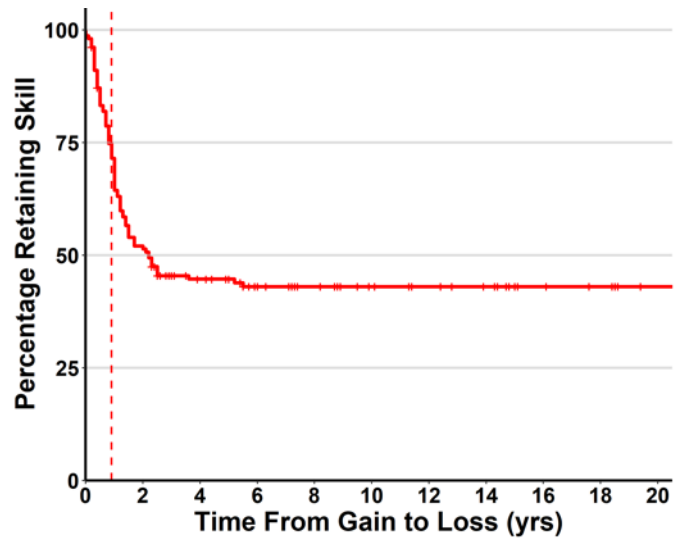

Respond To Familiar Words

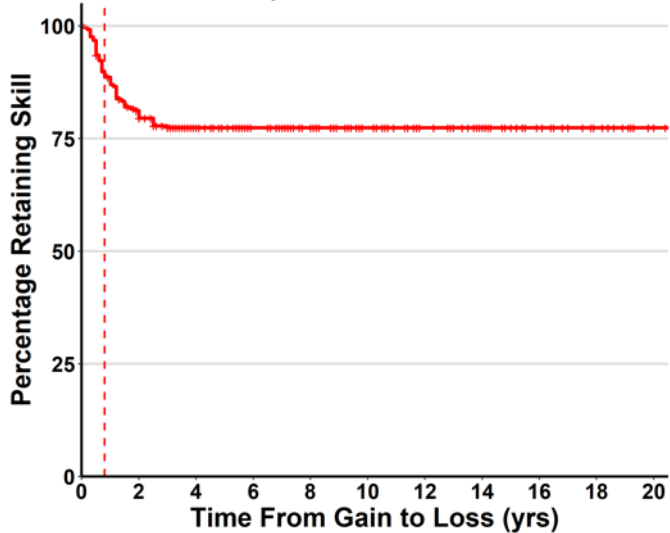

Respond To Own Name

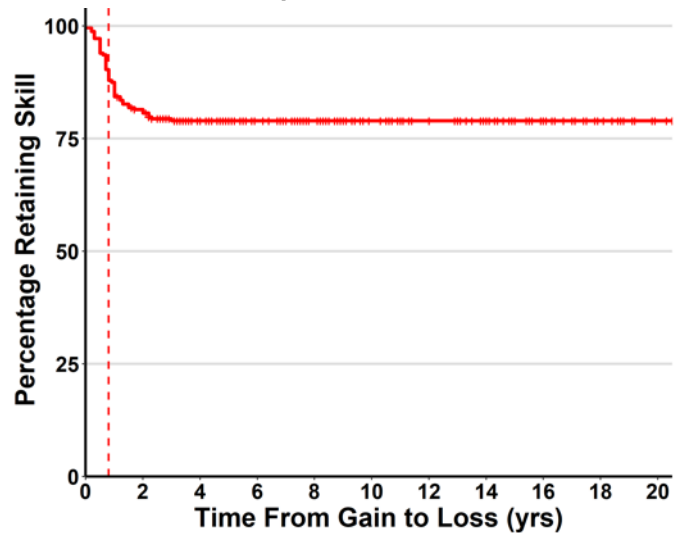

**Inhibit To No**

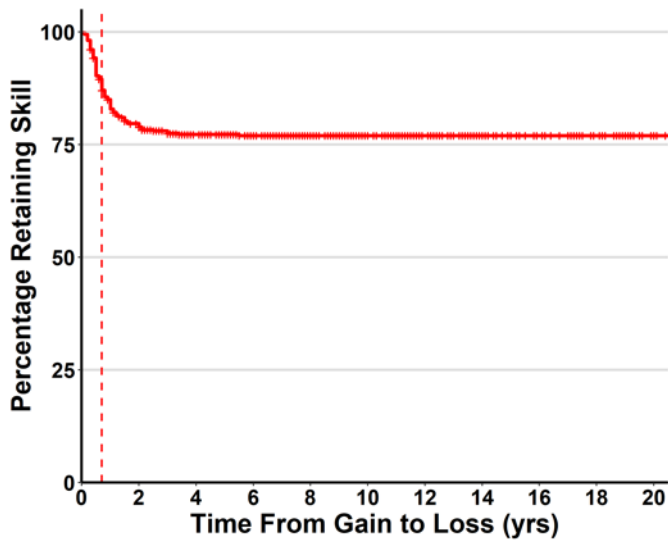

**Follows Command With Gesture**

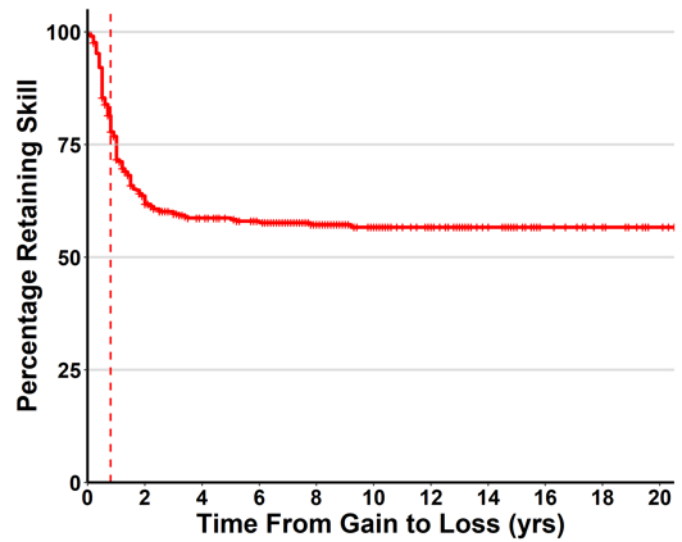

**Follows Command Without Gesture**

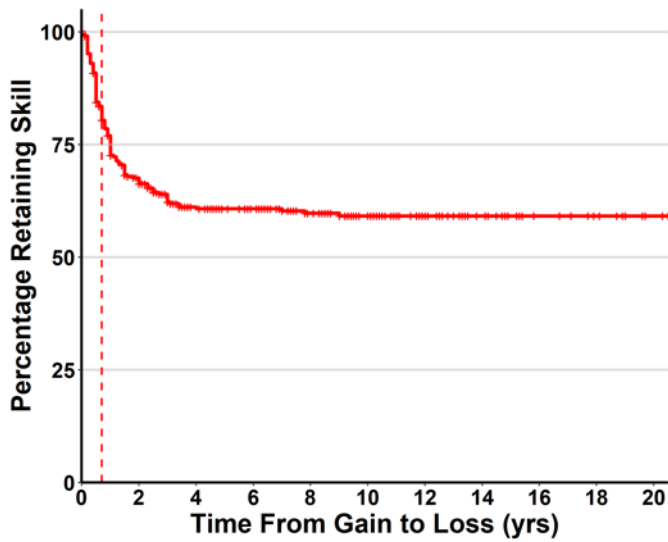

**Identify Body Parts**

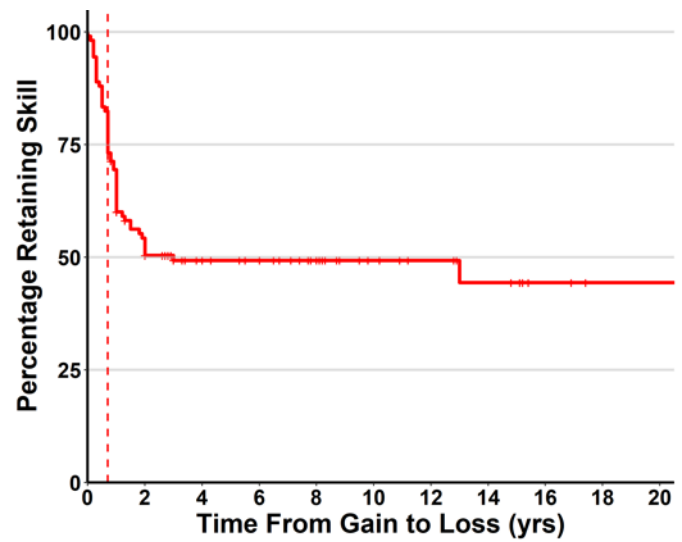

**Point To 1 Color**

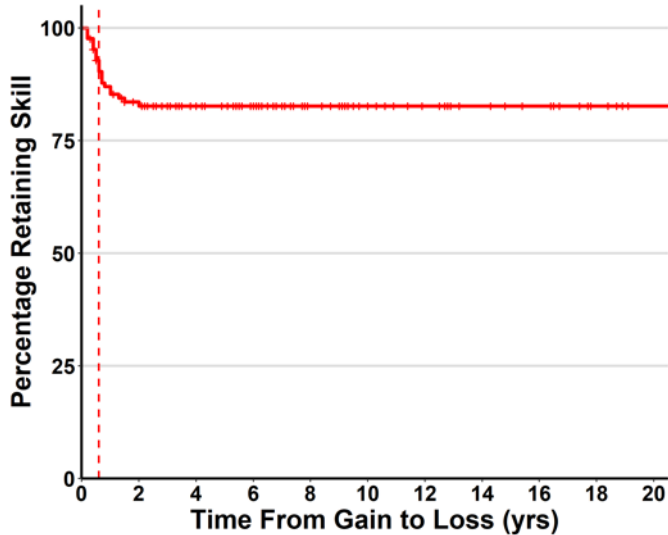

**Like Being Held**

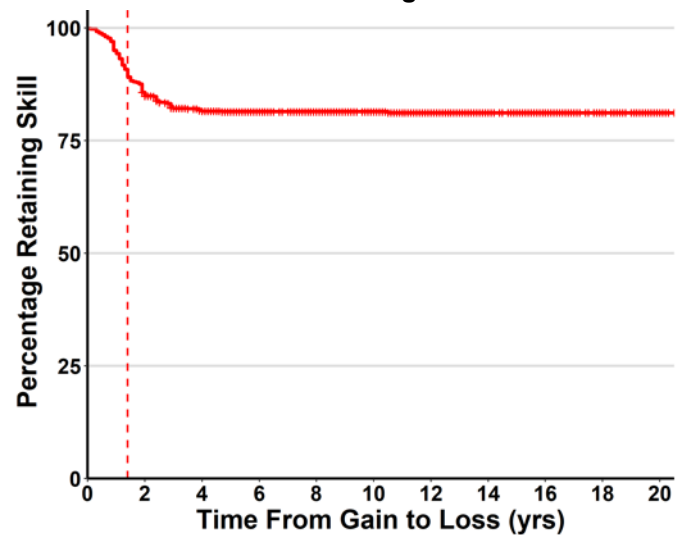

Attention To Loud Sounds

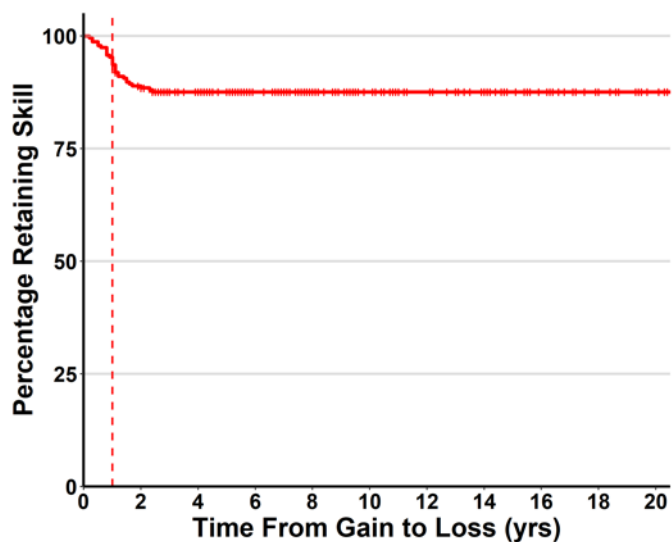

Eyes Fix and Follow

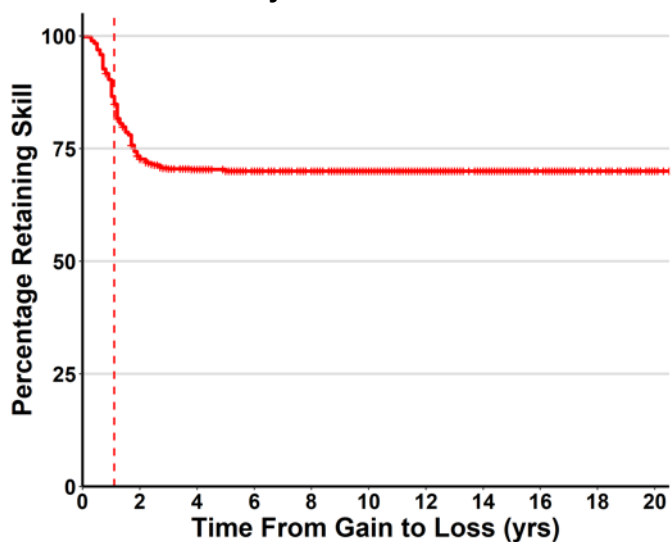

Play Pat-A-Cake

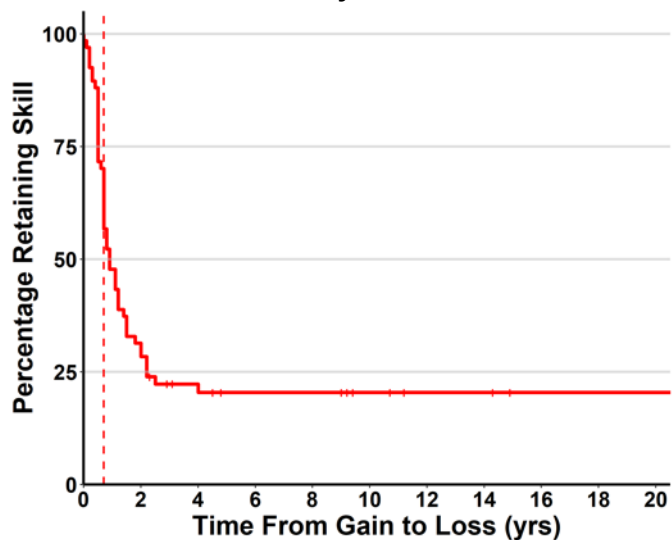

Desire Social Attention

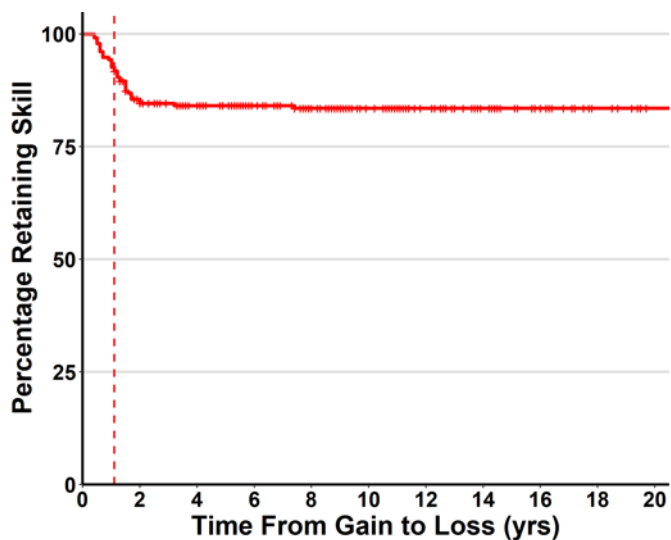

Imitate Peers

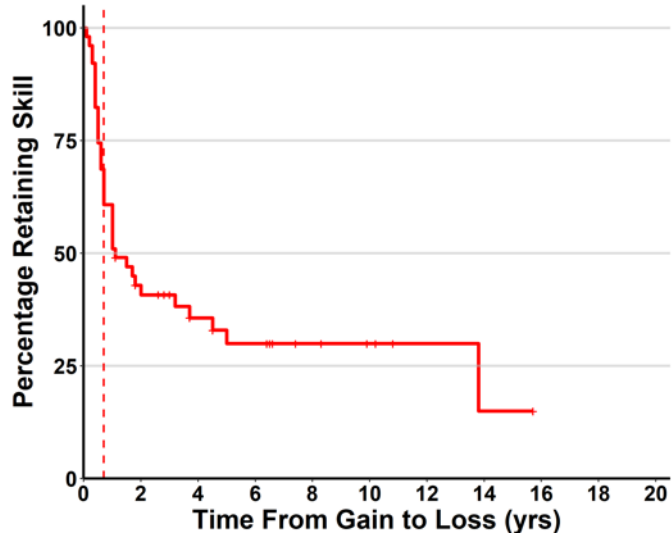

Been Independent

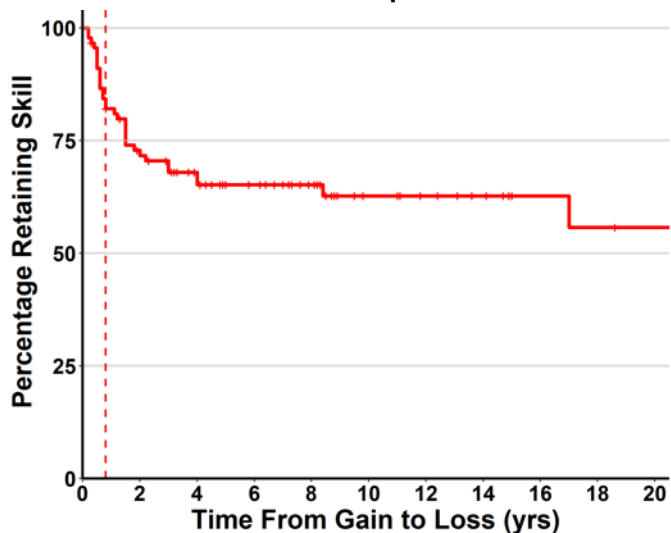



Drinks From Cup Without Help

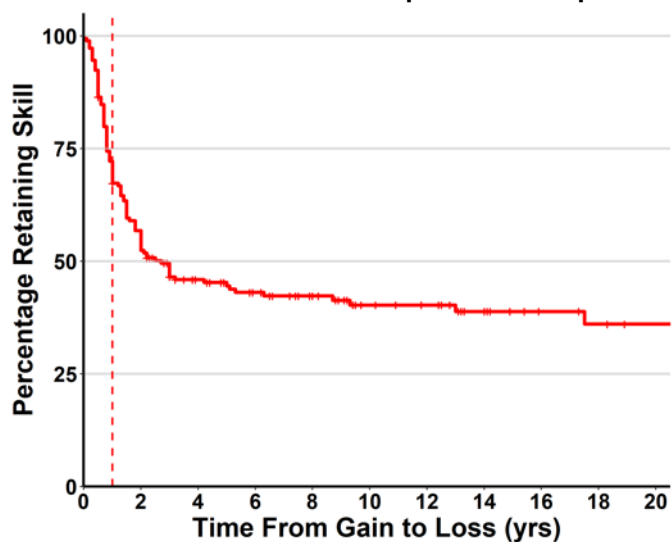

Uses Utensils With Help

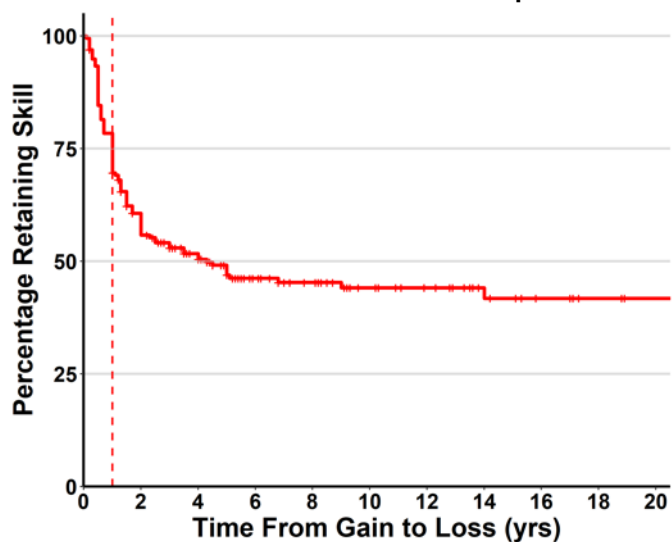

Uses Utensils Without Help

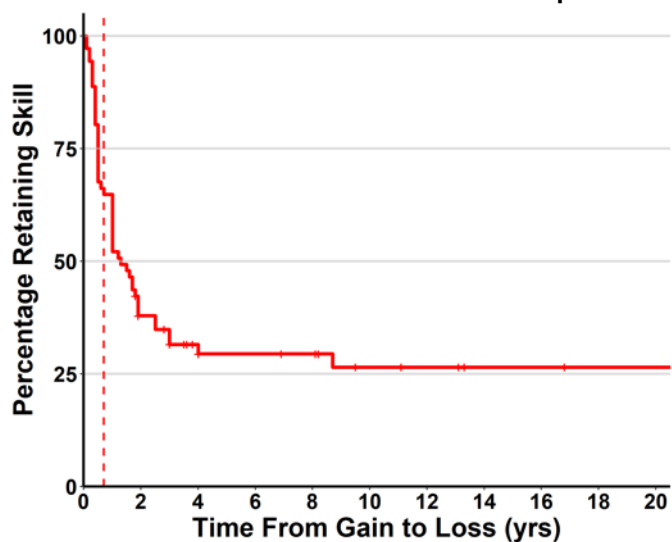

Supplement: Supplementary file [file 148682929bb3a657deee2ba3.pdf]
