# Supplementary material for: Trajectory of skill acquisition, loss, and regain in females with classic Rett syndrome
Source: Research Square preprint supplement (doi:10.21203/rs.3.rs-8245192/v1), 2025-12-15
Supplement: Supplementary file [file 5a75974d97a76dc1fa604943.pdf]

**Table S3: Developmental skill mapping between protocols 5201 and 5211**

|                 | Skill Name Utilized for Manuscript | 5211 Skill Name                                                  | 5201 Skill Name                  |
|-----------------|------------------------------------|------------------------------------------------------------------|----------------------------------|
| Gross Motor     | Lift Head                          | Lift head while lying down                                       | <i>Not captured</i>              |
|                 | Roll From Tummy                    | Rolled from tummy to back                                        | Roll front to back               |
|                 | <i>Not included</i>                | <i>Not captured</i>                                              | Roll back to front               |
|                 | Sit With Support                   | Sat with support when placed                                     | <i>Not captured</i>              |
|                 | Sit Without Support                | Sat without support when placed                                  | Sits when placed                 |
|                 | Come to Sit                        | Come to sitting                                                  | Come to sit                      |
|                 | Crawl                              | Crawled                                                          | Crawl                            |
|                 | Stand With Support                 | Stood while holding on                                           | <i>Not captured</i>              |
|                 | Pull To Stand                      | Pulled to standing                                               | Pull to stand                    |
|                 | Walk With Support                  | Cruised around furniture or holding on to someone                | Walk with support                |
|                 | Stand Independently                | Stood independently                                              | <i>Not included</i>              |
|                 | Walk Independently                 | Walked independently                                             | Walk independently               |
|                 | Run 10 Feet                        | Ran 10 feet without falling                                      | <i>Not included</i>              |
|                 | Up Stairs With Help                | Climbed up stairs with help                                      | <i>Not included</i>              |
|                 | Up Stairs Without Help             | Climbed up stairs without help                                   | Stairs up without help           |
|                 | Down Stairs With Help              | Climbed down stairs with help                                    | <i>Not included</i>              |
|                 | Down Stairs Without Help           | Climbed down stairs without help                                 | Stairs down without help         |
|                 | <i>Not included</i>                | <i>Not captured</i>                                              | Pedal tricycle                   |
| Fine Motor      | Hold Bottle                        | Held bottle or cup un-propped                                    | Holds bottle                     |
|                 | Reach for Toy                      | Reached for toy                                                  | Reach for toy                    |
|                 | Raking Grasp                       | Used raking grasp to retrieve and object                         | <i>Not captured</i>              |
|                 | Transfer Objects                   | Transferred an object from one hand to the other                 | Transfer                         |
|                 | Pincer Grasp                       | Used a pincer grasp                                              | Pincer grasp                     |
|                 | Finger Feeding                     | Finger feed                                                      | Finger feed                      |
|                 | Turn Pages in Book                 | Turned pages in book                                             | <i>Not captured</i>              |
| Expressive      | Social Smile                       | Social smile                                                     | Social smile                     |
|                 | Cooing                             | Cooed                                                            | Coo                              |
|                 | Babbling                           | Babbled                                                          | Babble                           |
|                 | Words With Meaning                 | Used words with meaning                                          | Single words with meaning        |
|                 | Spoken Phrases                     | Spoken in phrases                                                | Phrases                          |
|                 | Wave Bye                           | Waved bye-bye                                                    | Gestures (waves)                 |
|                 | Point for Wants                    | Pointed for something they want                                  | Points for wants                 |
|                 | Shared Stories                     | Shared stories                                                   | <i>Not captured</i>              |
| Receptive       | Quiet To Voice                     | Quieted or been soothed by the sound of a familiar adult's voice | Quiet to voice                   |
|                 | Responds To Sounds                 | Responded to sounds                                              | <i>Not captured</i>              |
|                 | Play Peek-A-Boo                    | Played Peekaboo                                                  | <i>Not captured</i>              |
|                 | Respond To Familiar Words          | Responded to familiar names/words such as mama or doggy          | <i>Not captured</i>              |
|                 | Respond To Own Name                | Responded to own name                                            | <i>Not captured</i>              |
|                 | Inhibit To No                      | Inhibited to "no" or responded to different tones of voice       | Inhibit to "No"                  |
|                 | Follows Commands With Gesture      | Followed a command with a gesture                                | Follow command with gesture      |
|                 | Follows Commands Without Gesture   | Followed a command without a gesture                             | Follow command without gesture   |
| Social/Adaptive | Identify Body Parts                | Identified body parts (pointed with eyes or fingers)             | <i>Not captured</i>              |
|                 | Point to 1 Color                   | Pointed to 1 color when asked (with fingers or eyes)             | <i>Not captured</i>              |
|                 | Like Being Held                    | Like being held                                                  | Like being held                  |
|                 | Attention to Loud Sound            | Paid attention to loud or prolonged sound                        | Stopped being aurally attentive  |
|                 | <i>Not included</i>                | <i>Not captured</i>                                              | Stopped being visually attentive |
|                 | Eyes Fix and Follow                | Fixed and followed an object with eyes                           | Fix and follow                   |
|                 | Play Pat-A-Cake                    | Played pat-a-cake                                                | <i>Not captured</i>              |
|                 | Desire Social Attention            | Desired social attention                                         | <i>Not captured</i>              |
|                 | Imitate Peers                      | Imitated peers in play activity                                  | <i>Not captured</i>              |
|                 | Been Independent                   | Been Independent - wanted to do things by themselves             | <i>Not captured</i>              |
|                 | Drink From Cup Without Help        | Taken a drink from a cup held without assistance                 | <i>Not captured</i>              |
|                 | Uses Utensils With Help            | Used a spoon/fork to eat with assistance                         | <i>Not captured</i>              |
|                 | Uses Utensils Without Help         | Used a spoon/fork to eat without assistance                      | <i>Not captured</i>              |
